# Supplementary material for: Identification of Proteins Associated with Multilamellar Bodies Produced by Dictyostelium discoideum
Source: PubMed Central journal article supplement (PMC4920372; doi:10.1371/journal.pone.0158270), 2016-06-24
Supplement: pone.0158270.s001.pdf [file pone.0158270.s001.pdf]

**S1 Table. Complete list of proteins associated with MLBs based on mass spectrometric analyses.** Proteins identified only once and with three peptide counts or fewer are not listed in the table.

| <b>Protein</b> | <b>Description</b>                                                        | <b>Gene ID</b> | <b>Molecular weight (kDa)</b> | <b>Number of identifications on 3 analyses</b> |
|----------------|---------------------------------------------------------------------------|----------------|-------------------------------|------------------------------------------------|
| <b>PonC</b>    | Ponticulin-like protein                                                   | DDB_G0286717   | 15                            | 3                                              |
|                |                                                                           | DDB_G0286715   |                               |                                                |
|                |                                                                           | DDB_G0286721   |                               |                                                |
|                |                                                                           | DDB_G0286719   |                               |                                                |
|                |                                                                           | DDB_G0286723   |                               |                                                |
| <b>PhoPQ</b>   | PhoPQ-activated pathogenicity-related protein                             | DDB_G0276897   | 56                            | 3                                              |
| <b>SctA</b>    | Secreted Protein A                                                        | DDB_G0278725   | 18                            | 3                                              |
| <b>EfbA</b>    | Elongation factor 2                                                       | DDB_G0288373   | 93                            | 3                                              |
| <b>rpl13</b>   | S60 ribosomal protein L13                                                 | DDB_G0291870   | 24                            | 3                                              |
| <b>rpl13a</b>  | S60 ribosomal protein L13a                                                | DDB_G0275881   | 21                            | 3                                              |
| <b>CDD</b>     | Cytidine/deoxycytidylate deaminase zinc-binding domain-containing protein | DDB_G0292096   | 35                            | 3                                              |
| <b>rpl4</b>    | 60S ribosomal protein L4                                                  | DDB_G0277803   | 40                            | 3                                              |
| <b>act1</b>    | Major actin                                                               | DDB_G0289553   | 42                            | 2                                              |
| <b>Ef1A</b>    | Elongation factor 1 alpha                                                 | DDB_G0269134   | 50                            | 2                                              |
|                |                                                                           | DDB_G0269136   |                               |                                                |
| <b>ancA</b>    | ADP/ATP translocase                                                       | DDB_G0267454   | 33                            | 2                                              |
| <b>mvpB</b>    | Major vault protein B                                                     | DDB_G0291127   | 95                            | 2                                              |
| <b>mppB</b>    | Mitochondrial processing peptidase beta subunit                           | DDB_G0288777   | 53                            | 2                                              |
| <b>ndkC</b>    | Nucleoside diphosphate kinase                                             | DDB_G0273069   | 17                            | 2                                              |
|                |                                                                           | DDB_G0273805   |                               |                                                |
| <b>rps4</b>    | 40S ribosomal protein S4                                                  | DDB_G0277975   | 17                            | 2                                              |

|                         |                                         |                              |    |   |
|-------------------------|-----------------------------------------|------------------------------|----|---|
| <b>vatM</b>             | V-ATPase subunit M                      | DDB_G0291858                 | 93 | 2 |
| <b>rpl14</b>            | S60 ribosomal protein L14               | DDB_G0277975                 | 17 | 2 |
| <b>atp1</b>             | ATP synthase                            | DDB_G0294012                 | 57 | 2 |
| <b>Prdx4</b>            | Peroxiredoxin 4                         | DDB_G0274859                 | 29 | 2 |
| <b>mvpA</b>             | Major vault protein-alpha               | DDB_G0269156                 | 94 | 2 |
| <b>pGAM</b>             | Phosphoglycerate mutase                 | DDB_G0285311                 | 28 | 2 |
| <b>rpl36</b>            | S60 ribosomal protein L36               | DDB_G0271668                 | 12 | 2 |
| <b>rpl28</b>            | 60S ribosomal protein L28               | DDB_G0282379                 | 14 | 2 |
| <b>rps8</b>             | 40S ribosomal protein S8                | DDB_G0291864                 | 24 | 2 |
| <b>efa1G</b>            | Elongation Factor 1 Gamma               | DDB_G0282979                 | 47 | 2 |
| <b>rpl21</b>            | S60 ribosomal protein L21               | DDB_G0279387                 | 18 | 2 |
| <b>tubB</b>             | Beta tubulin                            | DDB_G0269196                 | 51 | 2 |
| <b>rps9</b>             | 40S ribosomal protein S9                | DDB_G0289877                 | 21 | 2 |
| <b>Carboxylesterase</b> | Carboxylesterase, type B family protein | DDB_G0279717                 | 59 | 2 |
| <b>H2AX</b>             | Histone H2A                             | DDB_G0279667                 | 17 | 2 |
| <b>act3</b>             | Actin                                   | DDB_G0289487                 | 42 | 1 |
| <b>rps18</b>            | 40S ribosomal protein S18               | DDB_G0276415                 | 18 | 1 |
| <b>porA</b>             | Porin                                   | DDB_G0271848                 | 30 | 1 |
| <b>atp5b</b>            | ATP synthase Beta subunit               | DDB_G0269916                 | 71 | 1 |
| <b>Hsp70</b>            | Heat shock protein 70                   | DDB_G0273249<br>DDB_G0273623 | 70 | 1 |
| <b>mshp70</b>           | Stress-70 protein, mitochondrial        | DDB_G0293298                 | 71 | 1 |
| <b>aatA</b>             | Aspartate aminotransferase              | DDB_G0268664                 | 47 | 1 |
